# Supplementary material for: Ticagrelor vs Prasugrel for Acute Coronary Syndrome in Routine Care
Source: PubMed Central journal article supplement (PMC11612834; doi:10.1001/jamanetworkopen.2024.48389), 2024-12-02

## Supplementary Online Content

Krüger N, Krefting J, Kessler T, et al; for the DigiMed Bayern Consortium. Ticagrelor vs prasugrel for acute coronary syndrome in routine care. *JAMA Netw Open*. 2024;7(12):e2448389. doi:10.1001/jamanetworkopen.2024.48389

**eTable 1.** Diagnoses, Procedures, and Medication List

**eTable 2.** Eligibility Criteria Emulation

**eTable 3.** Baseline Preexposure Variables for Propensity Score Matching

**eTable 4.** Extended Preexposure Variables for Propensity Score Matching

**eTable 5.** Detailed Comparison of Results Between Database Study and IR5

**eTable 6.** Sensitivity Analyses

**eFigure 1.** Comparison of Primary and Safety End Points Between Database Study and IR5

**eFigure 2.** STEMI Subgroup Analysis—Primary End Point

**eFigure 3.** STEMI Subgroup Analysis—Safety End Point

This supplementary material has been provided by the authors to give readers additional information about their work.

**eTable 1 – Diagnoses, procedures and medication list.** Provided are International Classification of Diseases 10th Revision (ICD-10-GM), German procedure classification system (OPS) and Anatomical Therapeutic Chemical classification system (ATC) codes used in this study.

| <b>Diagnosis / Procedure / Medication</b>                                        | <b>Code</b>                                            |
|----------------------------------------------------------------------------------|--------------------------------------------------------|
| <b><i>International Classification of Diseases 10th Revision (ICD-10-GM)</i></b> |                                                        |
| Diabetes Mellitus                                                                | E10, E11, E12, E13, E14                                |
| Diabetes with Endorgan Involvement                                               | E11.2, E11.3, E11.4, E11.5, E10.2, E10.3, E10.4, E10.5 |
| Adipositas                                                                       | E66                                                    |
| Dyslipidemia                                                                     | E78                                                    |
| Alcohol Abuse                                                                    | F10                                                    |
| Nicotine Abuse                                                                   | F17                                                    |
| Transient Ischemic Attack                                                        | G45                                                    |
| Arterial Hypertension                                                            | I10, I15                                               |
| Malignant Hypertension                                                           | I10.1                                                  |
| Hypertensive Heart and/or Kidney Disease                                         | I11, I12, I13                                          |
| Unstable Angina Pectoris                                                         | I20.0                                                  |
| Stable Angina Pectoris                                                           | I20.8                                                  |
| Acute Myocardial Infarction                                                      | I21, I22                                               |
| ST- Segment Elevation Myocardial Infarction                                      | I21.0, I21.1, I21.2, I21.3, I22.0, I22.1, I22.8        |
| Non-ST Elevation Myocardial Infarction                                           | I21.4                                                  |
| Stent Thrombosis                                                                 | I25.16                                                 |
| Chronic Ischemic Heart Disease                                                   | I25                                                    |
| Chronic Ischemic Heart Disease with at least 2 vessel disease                    | I25.12, I25.13                                         |
| Atherosclerotic Heart Disease                                                    | I25.1                                                  |
| Old Myocardial Infarction                                                        | I25.2                                                  |
| Pulmonary Embolism                                                               | I26                                                    |
| AV Block Grade II and III                                                        | I44.1, I44.2                                           |
| Other Cardiac Arrhythmias                                                        | I49                                                    |
| Atrial Fibrillation and Flutter                                                  | I48                                                    |
| Sick Sinus Syndrome                                                              | I49.5                                                  |
| Chronic Heart Failure                                                            | I50                                                    |
| Intracranial Hemorrhage                                                          | I61                                                    |

|                                                                     |                                    |
|---------------------------------------------------------------------|------------------------------------|
| Major Bleeding                                                      | I60, I61, I62, K92.0, K92.1, K92.2 |
| Acute Stroke                                                        | I63, I64                           |
| Intracranial Arteriovenous Malformation or<br>Intracranial Aneurysm | I67.1                              |
| Atherosclerosis                                                     | I70                                |
| Aortic Atherosclerosis                                              | I70.0                              |
| Renal Atherosclerosis                                               | I70.1                              |
| Carotid stenosis                                                    | I65.2                              |
| Peripheral Artery Disease                                           | I70.2                              |
| Arterial Embolism Or Thrombosis                                     | I74                                |
| Venous Thrombosis                                                   | I80, I81, I82                      |
| Pneumonia                                                           | J13, J14, J15, J16                 |
| COPD                                                                | J44                                |
| Asthma                                                              | J45                                |
| Acute Kidney Failure                                                | N17                                |
| Chronic Kidney Disease                                              | N18*                               |
| Chronic Kidney Failure Stage 1 And 2                                | N18.1, N18.2                       |
| Chronic Kidney Failure Stage 3, 4 And 5                             | N18.3, N18.4, N18.5                |
| Chronic Renal Insufficiency Requiring Dialysis                      | N18.5                              |
| Other Chronic Kidney Disease                                        | N18.8, N18.9                       |

***German procedure classification system (OPS)***

|                                      |                                                                                                                                            |
|--------------------------------------|--------------------------------------------------------------------------------------------------------------------------------------------|
| Diagnostic Cardiac Catheterization   | 1-275*                                                                                                                                     |
| (Percutaneous) Transluminal Stenting | 8-837*                                                                                                                                     |
|                                      | Excl.: 8-837.7*, 8-837.8, 8-837.9,<br>8-837.a*, 8-837.b*, 8-837.c*, 8-<br>837.d*, 8-837.e, 8-837.f, 8-837.g,<br>8-837.h, 8-837.j, 8-837.s* |
| Coronary Artery Bypass Graft Surgery | 5-36*                                                                                                                                      |
| Complex treatment                    | 8-98*                                                                                                                                      |

***Anatomical Therapeutic Chemical classification system (ATC)***

|                   |             |
|-------------------|-------------|
| Heparin           | B01AB       |
| Antiarrhythmics   | C01B, C01AA |
| Nitrates          | C01DA       |
| Antihypertensives | C02         |

|                                  |                                                                                                                                                                                                                                                             |
|----------------------------------|-------------------------------------------------------------------------------------------------------------------------------------------------------------------------------------------------------------------------------------------------------------|
| Thiazides                        | C03A, C03EA, C07B, C07D,<br>C09BA21, C09BA22, C09BA23,<br>C09BA25, C09BA26, C09BA27,<br>C09BA28, C09BA29, C09BA33,<br>C09BA35, C09BA54, C09DA21,<br>C09DA22, C09DA23, C09DA24,<br>C09DA26, C09DA27, C09DA28                                                 |
| Other Diuretics                  | C03B, C03DB, C03EA, C03EB,<br>C03EC, C03X, C09BA01,<br>C09BA02, C09BA03, C09BA04,<br>C09BA05, C09BA06, C09BA07,<br>C09BA08, C09BA09, C09BA12,<br>C09BA13, C09BA15, C09DA01,<br>C09DA02, C09DA03, C09DA04,<br>C09DA06, C09DA07, C09DA08,<br>C09DA09, C09DA10 |
| Loop Diuretics                   | C03C, C03EB, C03ED, C07C,<br>C07D, C09BA55                                                                                                                                                                                                                  |
| Aldosteron Antagonists           | C03DA, C03EC, C03ED                                                                                                                                                                                                                                         |
| Beta Blocking Agents             | C07A, C07B, C07C, C07D, C07E,<br>C07FB                                                                                                                                                                                                                      |
| Calcium Channel Blockers         | C07FB, C08, C09BB, C09DB                                                                                                                                                                                                                                    |
| ACE Inhibitors                   | C09A, C09BA01, C09BA02,<br>C09BA03, C09BA04, C09BA05,<br>C09BA06, C09BA07, C09BA08,<br>C09BA09, C09BA12, C09BA13,<br>C09BA15, C09BA21, C09BA22,<br>C09BA23, C09BA25, C09BA26,<br>C09BA27, C09BA28, C09BA29,<br>C09BA33, C09BA35, C09BA54,<br>C09BA55, C09BB |
| Angiotensin II Receptor Blockers | C09CA, C09DA01, C09DA02,<br>C09DA03, C09DA04, C09DA06,<br>C09DA07, C09DA08, C09DA09,<br>C09DA10, C09DA21, C09DA22,<br>C09DA23, C09DA24, C09DA26,<br>C09DA27, C09DA28, C09DB                                                                                 |

|                                       |                            |
|---------------------------------------|----------------------------|
| Angiogenesis Inhibitors               | C09DX                      |
| Statins                               | C10AA                      |
| Other Lipid Modifying Agents          | C10AB, C10AC, C10AD, C10AX |
| Oral Immunosuppressants               | L04                        |
| NSAIDs                                | M01A, M01BA, N02BA         |
| Opioids                               | N02A                       |
| Non-Opioid Analgetica                 | N02BB, N02BE, N02BG        |
| Drugs for obstructive airway diseases | R03                        |

**eTable 2 – Eligibility criteria emulation.** Provided are the inclusion and exclusion criteria of IR5 and their applicability in the database study. 1. The combination of diagnosis and invasive strategy is used to emulate “planned invasive strategy” 2. Inherent in the coding of the associated ICD-10-GM diagnosis. 3. Only 1 of the following criteria was required to apply for this emulation

| Inclusion Criteria IR5                                                                                                                                                                                                                                                                                                                                                                                     | Applicability in database study                                                            |
|------------------------------------------------------------------------------------------------------------------------------------------------------------------------------------------------------------------------------------------------------------------------------------------------------------------------------------------------------------------------------------------------------------|--------------------------------------------------------------------------------------------|
| Hospitalization for an Acute Coronary Syndrome: STEMI, NSTEMI or Unstable Angina Pectoris<br>● With Planned Invasive Strategy                                                                                                                                                                                                                                                                              | Yes<br>Indirectly [1]                                                                      |
| ST-Segment Elevation myocardial Infarction                                                                                                                                                                                                                                                                                                                                                                 | Yes                                                                                        |
| ● Chest discomfort suggestive of cardiac ischemia ≥ 20 minutes at rest, within 24 h prior to randomization                                                                                                                                                                                                                                                                                                 | No                                                                                         |
| ● 1 of the following ECG features:<br>○ ST-segment elevation ≥ 1 mm in ≥ 2 contiguous ECG leads or<br>○ new or presumably new left bundle branch block (LBBB)                                                                                                                                                                                                                                              | Indirectly [2]                                                                             |
| Non-ST-Segment Elevation myocardial Infarction                                                                                                                                                                                                                                                                                                                                                             | Yes                                                                                        |
| ● Chest discomfort suggestive of cardiac ischemia for ≥ 10 minutes at rest within 48 h prior to randomization                                                                                                                                                                                                                                                                                              | Indirectly [2]                                                                             |
| ● And 1 of the following criteria:<br>○ ST-segment depression ≥ 1 mm in ≥ 1 or 2 contiguous ECG leads or<br>○ Troponin T or I or CK-MB greater than the upper limit of normal                                                                                                                                                                                                                              | Indirectly [2]                                                                             |
| ● Or 2 of the following clinical criteria:<br>○ Age ≥ 60 years<br>○ ≥ 3 risk factors for coronary artery disease:<br>arterial hypertension,<br>hypercholesterolemia,<br>family history,<br>diabetes mellitus,<br>current smoker<br>○ Diabetes mellitus<br>○ Aspirin use in the past 7 days<br>○ Severe angina (≥ 2 episodes within the last 24 hours)<br>○ Chronic renal dysfunction<br>○ Prior MI or CABG | [3]<br>Yes<br><br>Yes<br>Yes<br>No<br>Yes<br>Yes<br><br>No<br>Indirectly [2]<br>Yes<br>Yes |

|                                                                                                                                                                                                                                                                                                                                                                                                                                                                               |                                                |
|-------------------------------------------------------------------------------------------------------------------------------------------------------------------------------------------------------------------------------------------------------------------------------------------------------------------------------------------------------------------------------------------------------------------------------------------------------------------------------|------------------------------------------------|
| <ul style="list-style-type: none"> <li>○ Known CAD with <math>\geq 50\%</math> stenosis in <math>\geq 2</math> vessels</li> <li>○ Carotid stenosis <math>\geq 50\%</math> or cerebral revascularization</li> <li>○ Peripheral artery disease</li> </ul>                                                                                                                                                                                                                       | Indirectly [2]<br>Indirectly [2]<br>Yes        |
| Age $\geq 18$ Years                                                                                                                                                                                                                                                                                                                                                                                                                                                           | Yes                                            |
| <b>Exclusion Criteria IR5</b>                                                                                                                                                                                                                                                                                                                                                                                                                                                 | <b>Applicability<br/>in database<br/>study</b> |
| Intolerance of/ or allergy to Ticagrelor or Prasugrel                                                                                                                                                                                                                                                                                                                                                                                                                         | Indirectly [2]                                 |
| History of any stroke, transient ischemic attack, or intracranial bleeding                                                                                                                                                                                                                                                                                                                                                                                                    | Yes                                            |
| Known intracranial neoplasm                                                                                                                                                                                                                                                                                                                                                                                                                                                   | No                                             |
| Intracranial arteriovenous malformation or intracranial Aneurysm                                                                                                                                                                                                                                                                                                                                                                                                              | Yes                                            |
| Fibrin-specific fibrinolytic therapy less than 24 h before randomization, non-fibrin-specific fibrinolytic therapy less than 48h before randomization                                                                                                                                                                                                                                                                                                                         | No                                             |
| Known platelet count $< 100.000/ml$ at the time of screening                                                                                                                                                                                                                                                                                                                                                                                                                  | No                                             |
| Clinical findings, that in the judgment of the investigator are associated with an increased risk of bleeding                                                                                                                                                                                                                                                                                                                                                                 | No                                             |
| Known anemia (Hemoglobin $< 10$ g/dl) at the time of screening                                                                                                                                                                                                                                                                                                                                                                                                                | No                                             |
| Oral anticoagulation                                                                                                                                                                                                                                                                                                                                                                                                                                                          | Yes                                            |
| INR known to be greater than 1.5 at the time of screening                                                                                                                                                                                                                                                                                                                                                                                                                     | No                                             |
| Chronic renal insufficiency requiring dialysis                                                                                                                                                                                                                                                                                                                                                                                                                                | Yes                                            |
| Moderate or severe hepatic dysfunction (Child Pugh B or C)                                                                                                                                                                                                                                                                                                                                                                                                                    | No                                             |
| Increased risk of bradycardia events (Sick Sinus, AV block grade II or III, Bradycardia-Induced Syncope)                                                                                                                                                                                                                                                                                                                                                                      | Yes                                            |
| Index event is an acute complication ( $< 30$ days) of PCI                                                                                                                                                                                                                                                                                                                                                                                                                    | No                                             |
| Concomitant medical illness that in the opinion of the investigator is associated with a life expectancy $< 1$ year                                                                                                                                                                                                                                                                                                                                                           | No                                             |
| Concomitant oral or i.v. Therapy with strong CYP3A inhibitors (e.g. Ketoconazole, Itraconazole, Voriconazole, Telithromycin, Clarithromycin, Nefazodone, Ritonavir, Saquinavir, Nelfinavir, Indinavir, Atazanavir, grapefruit juice $>1$ l/d), CYP3A substrates with narrow therapeutic indices (e.g. Cyclosporine, Quinidine), or strong CYP3A inducers (e.g. Rifampin/Rifampicin, Phenytoin, Carbamazepine, Dexamethason, Phenobarbital) that cannot be safely discontinued | No                                             |
| $\geq 1$ doses of ticagrelor or prasugrel within 5 days before randomization                                                                                                                                                                                                                                                                                                                                                                                                  | Yes                                            |
| Pregnancy, giving birth within the last 90 days, or lactation                                                                                                                                                                                                                                                                                                                                                                                                                 | No                                             |
| Inability to cooperate with protocol requirements                                                                                                                                                                                                                                                                                                                                                                                                                             | No                                             |

**eTable 3 – Baseline preexposure variables for propensity score matching.** Provided are the individual variables for the applied baseline propensity score matching used in the study.

|    |                                                         |
|----|---------------------------------------------------------|
| 1  | Age                                                     |
| 2  | Sex                                                     |
| 3  | Chronic Heart Failure                                   |
| 4  | Nicotine Abuse                                          |
| 5  | Diabetes Mellitus                                       |
| 6  | Chronic Kidney Disease                                  |
| 7  | Obesity                                                 |
| 8  | Arterial Hypertension                                   |
| 9  | Hyperlipidemia                                          |
| 10 | Chronic Ischemic Heart Disease                          |
| 11 | Peripheral Arterial Disease                             |
| 12 | ST-Elevation Myocardial Infarction                      |
| 13 | Non-ST-Elevation Myocardial Infarction                  |
| 14 | Unstable Angina Pectoris                                |
| 15 | Cardiac Catheterization                                 |
| 16 | Percutaneous Coronary Intervention within the last year |
| 17 | Coronary Aortic Bypass Grafting within the last year    |
| 18 | Insulin intake                                          |
| 19 | ACS hospitalization in 2013                             |
| 20 | ACS hospitalization in 2014                             |
| 21 | ACS hospitalization in 2015                             |
| 22 | ACS hospitalization in 2016                             |
| 23 | ACS hospitalization in 2017                             |
| 24 | ACS hospitalization in 2018                             |
| 25 | ACS hospitalization in 2019                             |
| 26 | ACS hospitalization in 2020                             |
| 27 | ACS hospitalization in 2021                             |



**eTable 4 – Extended preexposure variables for propensity score matching.** Provided are the individual variables for the applied extended propensity score matching used in the study.

|    |                                                        |
|----|--------------------------------------------------------|
| 1  | Age                                                    |
| 2  | Sex                                                    |
| 3  | Nicotine Abuse                                         |
| 4  | Alcohol Abuse                                          |
| 5  | Hypertensive Heart and/or Kidney Disease               |
| 6  | Acute Kidney Disease                                   |
| 7  | Chronic Kidney Disease Stage 1 or 2                    |
| 8  | Chronic Kidney Disease Stage 3, 4, or 5 incl. Dialysis |
| 9  | Chronic Kidney Disease not Further Described           |
| 10 | Diabetes Mellitus                                      |
| 11 | Diabetes Mellitus with End Organ Involvement           |
| 12 | Obesity                                                |
| 13 | Arterial Hypertension                                  |
| 14 | Malignant Hypertension                                 |
| 15 | Hyperlipidemia                                         |
| 16 | Atrial Fibrillation                                    |
| 17 | Other Cardiac Arrhythmias                              |
| 18 | Stable Angina                                          |
| 19 | Chronic Ischemic Heart Disease                         |
| 20 | Old Myocardial Infarction                              |
| 21 | Chronic Heart Failure                                  |
| 22 | Peripheral Artery Disease                              |
| 23 | Arterial Embolism or Thrombosis                        |
| 24 | Thrombosis                                             |
| 25 | Lung Embolism                                          |
| 26 | Pneumonia                                              |
| 27 | Chronic Obstructive Pulmonary Disease                  |
| 28 | Bronchial Asthma                                       |
| 29 | History Of Percutaneous Coronary Intervention          |
| 30 | History Of Coronary Aortic Bypass Graft                |
| 31 | Medical Procedure Count                                |
| 32 | Intensive Care Count                                   |
| 33 | ST-Elevation Myocardial Infarction                     |
| 34 | Non-ST-Elevation Myocardial Infarction                 |

|    |                                                         |
|----|---------------------------------------------------------|
| 35 | Unstable Angina Pectoris                                |
| 36 | Diagnostic Heart Catheter                               |
| 37 | Percutaneous Coronary Intervention within the last year |
| 38 | Coronary Arotic Bypass Grafting within the last year    |
| 39 | Unique Medication Count                                 |
| 40 | Ace Inhibitors                                          |
| 41 | Angiotensin receptor blockers                           |
| 42 | Beta Blocking Agents                                    |
| 43 | Calcium Channel Blockers                                |
| 44 | Insulin                                                 |
| 45 | SGLT2 Inhibitors                                        |
| 46 | Other Antidiabetic Medications                          |
| 47 | Antiplatelet Agents                                     |
| 48 | Heparin                                                 |
| 49 | Anticoagulants                                          |
| 50 | Nonsteroidal Anti-inflammatory Drugs                    |
| 51 | Non Opioid Analgesics                                   |
| 52 | Opioids                                                 |
| 53 | Antiarrhythmics                                         |
| 54 | Antihypertensives                                       |
| 55 | Loop Diuretics                                          |
| 56 | Thiazide                                                |
| 57 | Other Diuretics                                         |
| 58 | Aldosterone Antagonists                                 |
| 59 | Statins                                                 |
| 60 | Other Lipid Modifying Agents                            |
| 61 | Anti-Obstructive Medication                             |
| 62 | Charlson Comorbidity Index from Year Before             |
| 63 | ACS hospitalization in 2013                             |
| 64 | ACS hospitalization in 2014                             |
| 65 | ACS hospitalization in 2015                             |
| 66 | ACS hospitalization in 2016                             |
| 67 | ACS hospitalization in 2017                             |
| 68 | ACS hospitalization in 2018                             |
| 69 | ACS hospitalization in 2019                             |
| 70 | ACS hospitalization in 2020                             |



**eTable 5** – Detailed comparison of results between database study and IR5. End points provided for the main analysis. Values are provided as n (%). MI, myocardial infarction.

| End points database study                             | Ticagrelor Group (n=8,821) | Prasugrel Group (n=8,821) | Hazard Ratio (95% CI)   |
|-------------------------------------------------------|----------------------------|---------------------------|-------------------------|
| Primary end point: all-cause mortality, MI, or stroke | <b>815 (9.2%)</b>          | <b>663 (7.5%)</b>         | <b>1.24 (1.12-1.37)</b> |
| All-cause mortality                                   | 135 (1.5%)                 | 106 (1.2%)                | 1.27 (0.99-1.64)        |
| MI                                                    | <b>693 (7.9%)</b>          | <b>573 (6.5%)</b>         | <b>1.20 (1.06-1.36)</b> |
| Stroke                                                | <b>259 (2.9%)</b>          | <b>199 (2.3%)</b>         | <b>1.33 (1.02-1.74)</b> |
| Stent thrombosis                                      | 461 (5.2%)                 | 397 (4.5%)                | 1.11 (0.89-1.30)        |
| Safety end point: major bleeding                      | 427 (4.8%)                 | 384 (4.4%)                | 1.12 (0.96-1.32)        |
| End points IR5                                        | Ticagrelor Group (n=2,012) | Prasugrel Group (n=2,006) | Hazard Ratio (95% CI)   |
| Primary end point: all-cause mortality, MI, or stroke | <b>184 (9.3%)</b>          | <b>137 (6.9%)</b>         | <b>1.36 (1.09-1.70)</b> |
| All-cause mortality                                   | 90 (4.5%)                  | 73 (3.7%)                 | 1.23 (0.91-1.68)        |
| MI                                                    | <b>96 (4.8%)</b>           | <b>60 (3.0%)</b>          | <b>1.63 (1.18-2.25)</b> |
| Stroke                                                | 22 (1.1%)                  | 19 (1.0%)                 | 1.17 (0.63-2.15)        |
| Stent thrombosis                                      | 26 (1.3%)                  | 20 (1.0%)                 | 1.30 (0.72-2.33)        |
| Safety end point: major bleeding                      | 95/1,989 (5.4%)            | 80/1,773 (4.8%)           | 1.12 (0.83-1.51)        |

**eTable 6** – Sensitivity analyses. Values are provided as n (%). MI, myocardial infarction; PSM, propensity score matching.

| Sensitivity analysis with extended list of preexposure variables for PSM | Ticagrelor Group (n=8,751) | Prasugrel Group (n=8,751) | Hazard Ratio (95% CI) |
|--------------------------------------------------------------------------|----------------------------|---------------------------|-----------------------|
| Primary end point: all-cause mortality, MI, or stroke                    | 795 (9.1%)                 | 643 (7.4%)                | 1.25 (1.13-1.38)      |
| Sensitivity analysis with “on-treatment” design                          | Ticagrelor Group (n=8,821) | Prasugrel Group (n=8,821) | Hazard Ratio (95% CI) |
| Primary end point: all-cause mortality, MI, or stroke                    | 681 (7.7%)                 | 599 (6.8%)                | 1.14 (1.03-1.28)      |

**eFigure 1** – Comparison of primary and safety end points between database study and IR5. Primary composite end point (all-cause mortality, MI and stroke) and safety end point (major bleeding). MI, myocardial infarction.

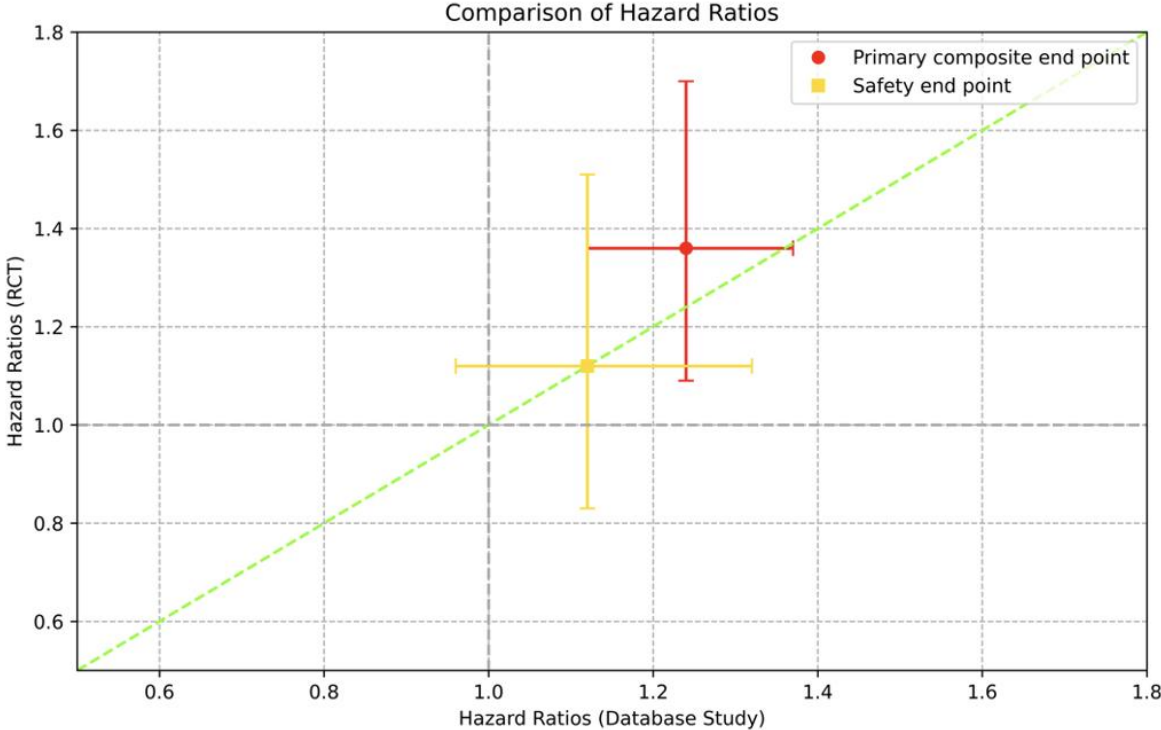

**eFigure 2 – STEMI subgroup analysis – primary end point.** The Kaplan-Meier curves show the cumulative incidence of the primary composite end point (all-cause mortality, MI, or stroke) at 1 year. ST-segment elevation myocardial infarction; MI, myocardial infarction.

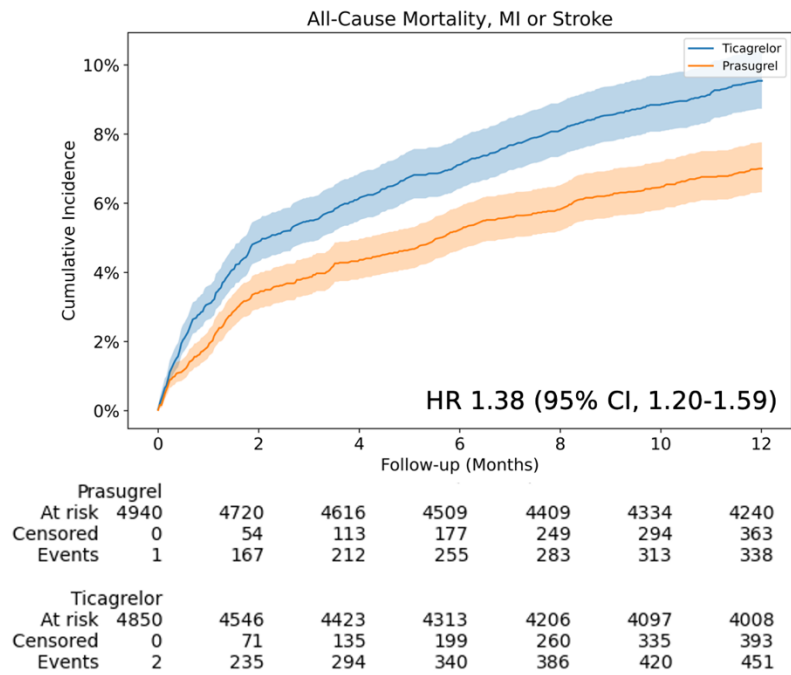

**eFigure 3 – STEMI subgroup analysis – safety end point.** The Kaplan-Meier curves show the cumulative incidence of the safety end point major bleeding at 1 year. Aalen-Johansen estimates are provided for bleeding considering competing risk of death. ST-segment elevation myocardial infarction

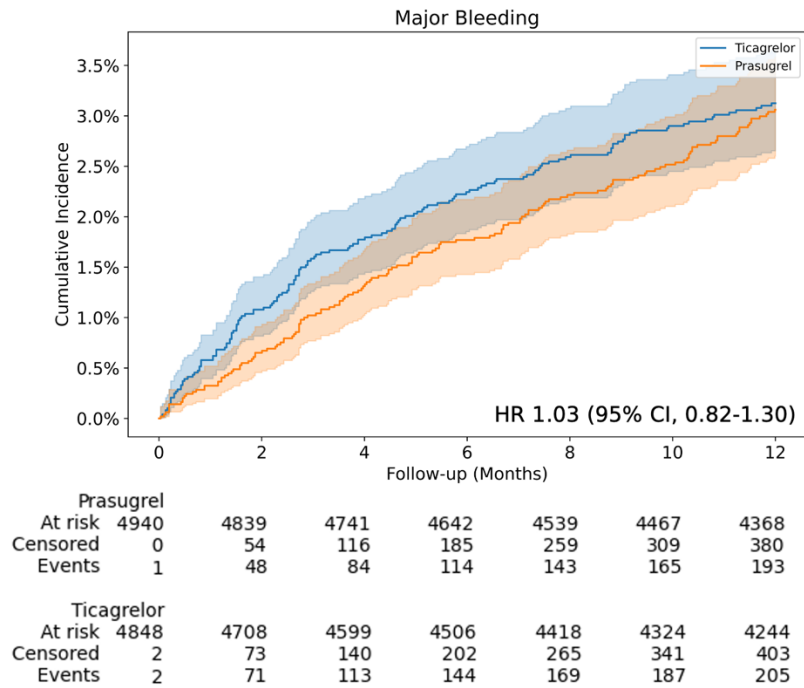

Supplement: jamanetwopen-e2448389-s001.pdf [file jamanetwopen-e2448389-s001.pdf]
