# Supplementary material for: Ticagrelor vs Prasugrel for Acute Coronary Syndrome in Routine Care
Source: PubMed Central journal article supplement (PMC11612834; doi:10.1001/jamanetworkopen.2024.48389), 2024-12-02
Supplement: jamanetwopen-e2448389-s002.pdf [file jamanetwopen-e2448389-s002.pdf]

\*First name, last name, and suffix (if applicable) are required and will appear in PubMed.

| <b>*Group Name(s): DigiMed Bayern Consortium</b> |                   |                              |                         |                                                                                                                                                                                                                 |                                                 |                                                                |                                                                                                   |
|--------------------------------------------------|-------------------|------------------------------|-------------------------|-----------------------------------------------------------------------------------------------------------------------------------------------------------------------------------------------------------------|-------------------------------------------------|----------------------------------------------------------------|---------------------------------------------------------------------------------------------------|
| <b>*First Name and Middle Initial(s)</b>         | <b>*Last Name</b> | <b>*Suffix (eg, Jr, III)</b> | <b>Academic Degrees</b> | <b>Institution</b>                                                                                                                                                                                              | <b>Location (city, state/province, country)</b> | <b>Role or Contribution, eg, chair, principal investigator</b> | <b>Group (if more than 1 Group listed in the byline) and/or Subgroup (eg, Steering Committee)</b> |
| Jonathan                                         | Adam              |                              | PhD                     | Institut für Medizinische Informationsverarbeitung Biometrie und Epidemiologie, Ludwig-Maximilians-Universität München, Munich, Germany; Institut für Epidemiologie, Helmholtz Zentrum München, Munich, Germany | Munich, Bavaria, Germany                        | Collaborator                                                   |                                                                                                   |
| Reiner                                           | Anselm            |                              | PhD                     | Institut Technik – Theologie – Naturwissenschaften, Ludwig-Maximilians-Universität München, Munich, Germany                                                                                                     | Munich, Bavaria, Germany                        | PI                                                             |                                                                                                   |
| Sara                                             | Ates              |                              | MD                      | Deutsches Herzzentrum München, Klinik für Herz- und Kreislauferkrankungen, Technische Universität München, Munich, Germany                                                                                      | Munich, Bavaria, Germany                        | Collaborator                                                   |                                                                                                   |
| Sabine                                           | Bauer             |                              | MSc                     | Sabine Bauer, Deutsches Herzzentrum München, Klinik für Herz- und Kreislauferkrankungen, Technische Universität München, Munich, Germany                                                                        | Munich, Bavaria, Germany                        | Collaborator                                                   |                                                                                                   |
| Nicole                                           | Beck              |                              |                         | Nicole Beck, Deutsches Herzzentrum München, Klinik für Herz- und Gefäßchirurgie, Technische Universität München, Munich, Germany                                                                                | Munich, Bavaria, Germany                        | Collaborator                                                   |                                                                                                   |
| Jürgen                                           | Beckmann          |                              | PhD                     | Fakultät für Sport- und Gesundheitswissenschaften, Technische Universität München, Munich, Germany                                                                                                              | Munich, Bavaria, Germany                        | Co-PI                                                          |                                                                                                   |

## Supplemental Online Content: Groupauthor Collaborators

\*First name, last name, and suffix (if applicable) are required and will appear in PubMed.

| *First Name and Middle Initial(s) | *Last Name   | *Suffix (eg, Jr, III) | Academic Degrees | Institution                                                                                                                                                        | Location (city, state/province, country) | Role or Contribution, eg, chair, principal investigator | Group (if more than 1 Group listed in the byline) and/or Subgroup (eg, Steering Committee) |
|-----------------------------------|--------------|-----------------------|------------------|--------------------------------------------------------------------------------------------------------------------------------------------------------------------|------------------------------------------|---------------------------------------------------------|--------------------------------------------------------------------------------------------|
| Riccardo                          | Berutti      |                       | PhD              | Institut für Neurogenomik, Helmholtz Zentrum München, Munich, Germany                                                                                              | Munich, Bavaria, Germany                 | Collaborator                                            |                                                                                            |
| Stefan                            | Brandmaier   |                       | PhD              | Institut für Epidemiologie, Helmholtz Zentrum München, Munich, Germany; Theresa Brunet, Institut für Humangenetik, Technische Universität München, Munich, Germany | Munich, Bavaria, Germany                 | Collaborator                                            |                                                                                            |
| Tim                               | Bruun        |                       | PhD              | BioM Biotech Cluster Development GmbH, Martinsried, Germany                                                                                                        | Martinsried, Bavaria, Germany            | Collaborator                                            |                                                                                            |
| Salvatore                         | Cassese      |                       | PhD              | Deutsches Herzzentrum München, Klinik für Herz- und Kreislauferkrankungen, Technische Universität München, Munich, Germany                                         | Munich, Bavaria, Germany                 | Collaborator                                            |                                                                                            |
| Manuela                           | Decker       |                       | MSc              | Deutsches Herzzentrum München, Klinik für Herz- und Kreislauferkrankungen, Technische Universität München, Munich, Germany                                         | Munich, Bavaria, Germany                 | Collaborator                                            |                                                                                            |
| Martin                            | Dichgans     |                       | MD               | Institut für Schlaganfall- und Demenzforschung, Ludwig-Maximilians-Universität München, Munich, Germany                                                            | Munich, Bavaria, Germany                 | Co-PI                                                   |                                                                                            |
| Philine                           | Diesselhorst |                       |                  | Institut Technik – Theologie – Naturwissenschaften, Ludwig-Maximilians-Universität                                                                                 | Munich, Bavaria, Germany                 | Collaborator                                            |                                                                                            |
| Horst                             | Domdey       |                       | PhD              | BioM Biotech Cluster Development GmbH, Martinsried, Germany                                                                                                        | Munich, Bavaria, Germany                 | Co-PI                                                   |                                                                                            |

## Supplemental Online Content: Groupauthor Collaborators

\*First name, last name, and suffix (if applicable) are required and will appear in PubMed.

| *First Name and Middle Initial(s) | *Last Name | *Suffix (eg, Jr, III) | Academic Degrees | Institution                                                                                                                                        | Location (city, state/province, country) | Role or Contribution, eg, chair, principal investigator | Group (if more than 1 Group listed in the byline) and/or Subgroup (eg, Steering Committee) |
|-----------------------------------|------------|-----------------------|------------------|----------------------------------------------------------------------------------------------------------------------------------------------------|------------------------------------------|---------------------------------------------------------|--------------------------------------------------------------------------------------------|
| Stefanie                          | Doppler    |                       | PhD              | Deutsches Herzzentrum München, Klinik für Herz- und Gefäßchirurgie, Technische Universität München, Munich, Germany                                | Munich, Bavaria, Germany                 | Collaborator                                            |                                                                                            |
| Martina                           | Dreßen     |                       | PhD              | Deutsches Herzzentrum München, Klinik für Herz- und Gefäßchirurgie, Technische Universität München, Munich, Germany                                | Munich, Bavaria, Germany                 | Collaborator                                            |                                                                                            |
| Arne                              | Dressler   |                       | PhD              | Institut Technik – Theologie – Naturwissenschaften, Ludwig-Maximilians-Universität München, Munich, Germany                                        | Munich, Bavaria, Germany                 | Collaborator                                            |                                                                                            |
| Florent                           | Dufour     |                       | MSc              | Leibniz-Rechenzentrum, Munich, Germany                                                                                                             | Munich, Bavaria, Germany                 | Collaborator                                            |                                                                                            |
| Sven                              | Duscha     |                       | PhD              | Deutsches Herzzentrum München, Klinik für Herz- und Kreislauferkrankungen, Technische Universität München, Munich, Germany                         | Munich, Bavaria, Germany                 | Collaborator                                            |                                                                                            |
| Hans H.                           | Eckstein   |                       | MD               | Klinik und Poliklinik für Vaskuläre und Endovaskuläre Chirurgie, Klinikums rechts der Isar, Technische Universität München, Munich, Germany        | Munich, Bavaria, Germany                 | Collaborator                                            |                                                                                            |
| Aiman                             | Farzeen    |                       | MSc              | Institut für Humangenetik, Technische Universität München, Munich, Germany; Institut für Epidemiologie, Helmholtz Zentrum München, Munich, Germany | Munich, Bavaria, Germany                 | Collaborator                                            |                                                                                            |

## Supplemental Online Content: Groupauthor Collaborators

\*First name, last name, and suffix (if applicable) are required and will appear in PubMed.

| *First Name and Middle Initial(s) | *Last Name     | *Suffix (eg, Jr, III) | Academic Degrees | Institution                                                                                                                | Location (city, state/province, country) | Role or Contribution, eg, chair, principal investigator | Group (if more than 1 Group listed in the byline) and/or Subgroup (eg, Steering Committee) |
|-----------------------------------|----------------|-----------------------|------------------|----------------------------------------------------------------------------------------------------------------------------|------------------------------------------|---------------------------------------------------------|--------------------------------------------------------------------------------------------|
| Therese                           | Feiler         |                       | PhD              | Institut Technik – Theologie – Naturwissenschaften, Ludwig-Maximilians-Universität München, Munich, Germany                | Munich, Bavaria, Germany                 | Collaborator                                            |                                                                                            |
| Christian                         | Friess         |                       | MD               | Deutsches Herzzentrum München, Klinik für Herz- und Kreislauferkrankungen, Technische Universität München, Munich, Germany | Munich, Bavaria, Germany                 | Collaborator                                            |                                                                                            |
| Ines                              | Gall           |                       |                  | Deutsches Herzzentrum München, Institut für Laboratoriumsmedizin, Technische Universität München, Munich, Germany          | Munich, Bavaria, Germany                 | Collaborator                                            |                                                                                            |
| Ulrich M                          | Gassner        |                       | PhD              | Juristische Fakultät, Universität Augsburg, Augsburg, Germany                                                              | Augsburg, Bavaria, Germany               | PI                                                      |                                                                                            |
| Christian                         | Gieger         |                       | PhD              | Institut für Epidemiologie, Helmholtz Zentrum München, Munich, Germany                                                     | Munich, Bavaria, Germany                 | Collaborator                                            |                                                                                            |
| Monica                            | Gotor-Blazquez |                       |                  | Deutsches Herzzentrum München, Klinik für Herz- und Kreislauferkrankungen, Technische Universität München, Munich, Germany | Munich, Bavaria, Germany                 | Collaborator                                            |                                                                                            |
| Ulrich                            | Gueldener      |                       | PhD              | Deutsches Herzzentrum München, Klinik für Herz- und Kreislauferkrankungen, Technische Universität München, Munich, Germany | Munich, Bavaria, Germany                 | Collaborator                                            |                                                                                            |
| Nicolay                           | Hammer         |                       | MSc              | Max-Planck-Institut für Biochemie, Munich, Germany                                                                         | Munich, Bavaria, Germany                 | Collaborator                                            |                                                                                            |

## Supplemental Online Content: Groupauthor Collaborators

\*First name, last name, and suffix (if applicable) are required and will appear in PubMed.

| *First Name and Middle Initial(s) | *Last Name   | *Suffix (eg, Jr, III) | Academic Degrees | Institution                                                                                                                | Location (city, state/province, country) | Role or Contribution, eg, chair, principal investigator | Group (if more than 1 Group listed in the byline) and/or Subgroup (eg, Steering Committee) |
|-----------------------------------|--------------|-----------------------|------------------|----------------------------------------------------------------------------------------------------------------------------|------------------------------------------|---------------------------------------------------------|--------------------------------------------------------------------------------------------|
| Johann                            | Hawe         |                       | PhD              | Deutsches Herzzentrum München, Klinik für Herz- und Kreislauferkrankungen, Technische Universität München, Munich, Germany | Munich, Bavaria, Germany                 | Collaborator                                            |                                                                                            |
| Verena                            | Heidel       |                       |                  | Deutsches Herzzentrum München, Klinik für Herz- und Kreislauferkrankungen, Technische Universität München, Munich, Germany | Munich, Bavaria, Germany                 | Collaborator                                            |                                                                                            |
| Thomas                            | Hendel       |                       |                  | Institut für Epidemiologie, Helmholtz Zentrum München, Munich, Germany                                                     | Munich, Bavaria, Germany                 | Collaborator                                            |                                                                                            |
| Stefan                            | Holdenrieder |                       | MD               | Deutsches Herzzentrum München, Institut für Laboratoriumsmedizin, Technische Universität München, Munich, Germany          | Munich, Bavaria, Germany                 | Collaborator                                            |                                                                                            |
| Stephan                           | Jonas        |                       | PhD              | Institut für Informatik, Technische Universität München, Munich, Germany                                                   | Munich, Bavaria, Germany                 | PI                                                      |                                                                                            |
| Muamer                            | Kameric      |                       |                  | Deutsches Herzzentrum München, Klinik für Herz- und Gefäßchirurgie, Technische Universität München, Munich, Germany        | Munich, Bavaria, Germany                 | Collaborator                                            |                                                                                            |
| Adnan                             | Kastrati     |                       | MD               | Deutsches Herzzentrum München, Klinik für Herz- und Kreislauferkrankungen, Technische Universität München, Munich, Germany | Munich, Bavaria, Germany                 | Collaborator                                            |                                                                                            |

## Supplemental Online Content: Groupauthor Collaborators

\*First name, last name, and suffix (if applicable) are required and will appear in PubMed.

| *First Name and Middle Initial(s) | *Last Name    | *Suffix (eg, Jr, III) | Academic Degrees | Institution                                                                                                                | Location (city, state/province, country) | Role or Contribution, eg, chair, principal investigator | Group (if more than 1 Group listed in the byline) and/or Subgroup (eg, Steering Committee) |
|-----------------------------------|---------------|-----------------------|------------------|----------------------------------------------------------------------------------------------------------------------------|------------------------------------------|---------------------------------------------------------|--------------------------------------------------------------------------------------------|
| Thorsten                          | Kessler       |                       | MD               | Deutsches Herzzentrum München, Klinik für Herz- und Kreislauferkrankungen, Technische Universität München, Munich, Germany | Munich, Bavaria, Germany                 | Collaborator                                            |                                                                                            |
| Katharina                         | Knoedseder    |                       |                  | Deutsches Herzzentrum München, Klinik für Herz- und Kreislauferkrankungen, Technische Universität München, Munich, Germany | Munich, Bavaria, Germany                 | Collaborator                                            |                                                                                            |
| Wolfgang                          | Koenig        |                       | MD               | Deutsches Herzzentrum München, Klinik für Herz- und Kreislauferkrankungen, Technische Universität München, Munich, Germany | Munich, Bavaria, Germany                 | Co-PI                                                   |                                                                                            |
| Florian                           | Kohlmayer     |                       | PhD              | Bitcare, Munich, Germany                                                                                                   | Munich, Bavaria, Germany                 | Collaborator                                            |                                                                                            |
| Markus                            | Krane         |                       | MD               | Deutsches Herzzentrum München, Klinik für Herz- und Gefäßchirurgie, Technische Universität München, Munich, Germany        | Munich, Bavaria, Germany                 | Collaborator                                            |                                                                                            |
| Dieter                            | Kranzelmüller |                       | PhD              | Institut für Informatik, Ludwig-Maximilians-Universität München, Munich, Germany                                           | Munich, Bavaria, Germany                 | PI                                                      |                                                                                            |
| Johannes                          | Krefting      |                       | MD               | Deutsches Herzzentrum München, Klinik für Herz- und Kreislauferkrankungen, Technische Universität München, Munich, Germany | Munich, Bavaria, Germany                 | Collaborator                                            |                                                                                            |
| Nils                              | Krüger        |                       | MD               | Deutsches Herzzentrum München, Klinik für Herz- und Kreislauferkrankungen, Technische Universität München, Munich, Germany | Munich, Bavaria, Germany                 | Collaborator                                            |                                                                                            |

## Supplemental Online Content: Groupauthor Collaborators

\*First name, last name, and suffix (if applicable) are required and will appear in PubMed.

| *First Name and Middle Initial(s) | *Last Name   | *Suffix (eg, Jr, III) | Academic Degrees | Institution                                                                                                                                 | Location (city, state/province, country) | Role or Contribution, eg, chair, principal investigator | Group (if more than 1 Group listed in the byline) and/or Subgroup (eg, Steering Committee) |
|-----------------------------------|--------------|-----------------------|------------------|---------------------------------------------------------------------------------------------------------------------------------------------|------------------------------------------|---------------------------------------------------------|--------------------------------------------------------------------------------------------|
| Anja                              | Kroke        |                       |                  | BioM Biotech Cluster Development GmbH, Martinsried, Germany                                                                                 | Martinsried, Bavaria, Germany            | Collaborator                                            |                                                                                            |
| Harald                            | Lahm         |                       | PhD              | Deutsches Herzzentrum München, Klinik für Herz- und Gefäßchirurgie, Technische Universität München, Munich, Germany                         | Munich, Bavaria, Germany                 | Collaborator                                            |                                                                                            |
| Ruediger                          | Lange        |                       | MD               | Deutsches Herzzentrum München, Klinik für Herz- und Gefäßchirurgie, Technische Universität München, Munich, Germany                         | Munich, Bavaria, Germany                 | Collaborator                                            |                                                                                            |
| Andreas                           | Lehmann      |                       | MSc              | Bitcare GmbH, Munich, Germany                                                                                                               | Munich, Bavaria, Germany                 | Collaborator                                            |                                                                                            |
| Ling                              | Li           |                       | PhD              | Deutsches Herzzentrum München, Klinik für Herz- und Kreislauferkrankungen, Technische Universität München, Munich, Germany                  | Munich, Bavaria, Germany                 | Collaborator                                            |                                                                                            |
| Birgit                            | Linkohr      |                       | PhD              | Institut für Epidemiologie, Helmholtz Zentrum München, Munich, Germany                                                                      | Munich, Bavaria, Germany                 | Collaborator                                            |                                                                                            |
| Lars                              | Maegdefessel |                       | MD               | Klinik und Poliklinik für Vaskuläre und Endovaskuläre Chirurgie, Klinikums rechts der Isar, Technische Universität München, Munich, Germany | Munich, Bavaria, Germany                 | PI                                                      |                                                                                            |
| Matthias                          | Mann         |                       | PhD              | Max-Planck-Institut für Biochemie, Munich, Germany                                                                                          | Munich, Bavaria, Germany                 | PI                                                      |                                                                                            |
| Rainer                            | Malik        |                       | PhD              | Institut für Schlaganfall- und Demenzforschung, Ludwig-Maximilians-Universität München, Munich, Germany                                     | Munich, Bavaria, Germany                 | Co-PI                                                   |                                                                                            |

## Supplemental Online Content: Groupauthor Collaborators

\*First name, last name, and suffix (if applicable) are required and will appear in PubMed.

| *First Name and Middle Initial(s) | *Last Name | *Suffix (eg, Jr, III) | Academic Degrees | Institution                                                                                                                                                                                                    | Location (city, state/province, country) | Role or Contribution, eg, chair, principal investigator | Group (if more than 1 Group listed in the byline) and/or Subgroup (eg, Steering Committee) |
|-----------------------------------|------------|-----------------------|------------------|----------------------------------------------------------------------------------------------------------------------------------------------------------------------------------------------------------------|------------------------------------------|---------------------------------------------------------|--------------------------------------------------------------------------------------------|
| Thomas                            | Meitinger  |                       | PhD              | Institut für Humangenetik, Technische Universität München, Munich, Germany                                                                                                                                     | Munich, Bavaria, Germany                 | Co-PI                                                   |                                                                                            |
| Irina                             | Neb        |                       |                  | Deutsches Herzzentrum München, Klinik für Herz- und Gefäßchirurgie, Technische Universität München, Munich, Germany                                                                                            | Munich, Bavaria, Germany                 | Collaborator                                            |                                                                                            |
| Tina                              | O'Hehir    |                       |                  | Deutsches Herzzentrum München, Klinik für Herz- und Kreislauferkrankungen, Technische Universität München, Munich, Germany                                                                                     | Munich, Bavaria, Germany                 | Collaborator                                            |                                                                                            |
| Shichao                           | Pang       |                       | PhD              | Deutsches Herzzentrum München, Klinik für Herz- und Kreislauferkrankungen, Technische Universität München, Munich, Germany                                                                                     | Munich, Bavaria, Germany                 | Collaborator                                            |                                                                                            |
| Benedikt                          | Perl       |                       | MSc              | Fakultät für Sport- und Gesundheitswissenschaften, Technische Universität München, Munich, Germany                                                                                                             | Munich, Bavaria, Germany                 | Collaborator                                            |                                                                                            |
| Annette                           | Peters     |                       | PhD              | Institut für Medizinische Informationsverarbeitung Biometrie und Epidemiologie Ludwig-Maximilians-Universität München, Munich, Germany; Institut für Epidemiologie, Helmholtz Zentrum München, Munich, Germany | Munich, Bavaria, Germany                 | PI                                                      |                                                                                            |
| Fatemeh                           | Peymani    |                       | MSc              | Institut für Humangenetik, Technische Universität München, Munich, Germany                                                                                                                                     | Munich, Bavaria, Germany                 | Collaborator                                            |                                                                                            |



## Supplemental Online Content: Groupauthor Collaborators

\*First name, last name, and suffix (if applicable) are required and will appear in PubMed.

| *First Name and Middle Initial(s) | *Last Name | *Suffix (eg, Jr, III) | Academic Degrees | Institution                                                                                                                | Location (city, state/province, country) | Role or Contribution, eg, chair, principal investigator | Group (if more than 1 Group listed in the byline) and/or Subgroup (eg, Steering Committee) |
|-----------------------------------|------------|-----------------------|------------------|----------------------------------------------------------------------------------------------------------------------------|------------------------------------------|---------------------------------------------------------|--------------------------------------------------------------------------------------------|
| Roland                            | Pichler    |                       | PhD              | Leibniz-Rechenzentrum, Munich, Germany                                                                                     | Munich, Bavaria, Germany                 | Collaborator                                            |                                                                                            |
| Heiko                             | Pfister    |                       |                  | Deutsches Herzzentrum München, Institut für Laboratoriumsmedizin, Technische Universität München, Munich, Germany          | Munich, Bavaria, Germany                 | Collaborator                                            |                                                                                            |
| Paola                             | Pisano     |                       | PhD              | Max-Planck-Institut für Biochemie, Munich, Germany                                                                         | Munich, Bavaria, Germany                 | Collaborator                                            |                                                                                            |
| Holger                            | Prokisch   |                       | PhD              | Institut für Humangenetik, Technische Universität München, Munich, Germany                                                 | Munich, Bavaria, Germany                 | Co-PI                                                   |                                                                                            |
| Irina                             | Pugach     |                       | PhD              | Deutsches Herzzentrum München, Klinik für Herz- und Kreislauferkrankungen, Technische Universität München, Munich, Germany | Munich, Bavaria, Germany                 | Collaborator                                            |                                                                                            |
| Lara M                            | Reimer     |                       | PhD              | Institut für Informatik, Technische Universität München, Munich, Germany                                                   | Munich, Bavaria, Germany                 | Collaborator                                            |                                                                                            |
| Michaela                          | Sander     |                       | PhD              | Deutsches Herzzentrum München, Institut für Laboratoriumsmedizin, Technische Universität München, Munich, Germany          | Munich, Bavaria, Germany                 | Collaborator                                            |                                                                                            |
| Veronika                          | Sanin      |                       | MD               | Deutsches Herzzentrum München, Klinik für Herz- und Kreislauferkrankungen, Technische Universität München, Munich, Germany | Munich, Bavaria, Germany                 | PI                                                      |                                                                                            |
| Lea D.                            | Schlieben  |                       | PhD              | Institut für Humangenetik, Technische Universität München, Munich, Germany                                                 | Munich, Bavaria, Germany                 | Collaborator                                            |                                                                                            |

## Supplemental Online Content: Groupauthor Collaborators

\*First name, last name, and suffix (if applicable) are required and will appear in PubMed.

| *First Name and Middle Initial(s) | *Last Name  | *Suffix (eg, Jr, III) | Academic Degrees | Institution                                                                                                                | Location (city, state/province, country) | Role or Contribution, eg, chair, principal investigator | Group (if more than 1 Group listed in the byline) and/or Subgroup (eg, Steering Committee) |
|-----------------------------------|-------------|-----------------------|------------------|----------------------------------------------------------------------------------------------------------------------------|------------------------------------------|---------------------------------------------------------|--------------------------------------------------------------------------------------------|
| Yannick                           | Schlote     |                       | MSc              | Institut Technik – Theologie – Naturwissenschaften, Ludwig-Maximilians-Universität München, Munich, Germany                | Munich, Bavaria, Germany                 | Collaborator                                            |                                                                                            |
| Sofie                             | Schmid      |                       | MD               | Klinikums rechts der Isar, Technische Universität München, Munich, Germany                                                 | Munich, Bavaria, Germany                 | Collaborator                                            |                                                                                            |
| Raphael S.                        | Schmieder   |                       | MD               | Deutsches Herzzentrum München, Klinik für Herz- und Kreislauferkrankungen, Technische Universität München, Munich, Germany | Munich, Bavaria, Germany                 | Collaborator                                            |                                                                                            |
| Heribert                          | Schunkert   |                       | MD               | Deutsches Herzzentrum München, Klinik für Herz- und Kreislauferkrankungen, Technische Universität München, Munich, Germany | Munich, Bavaria, Germany                 | Chair, PI                                               |                                                                                            |
| Marius                            | Schwab      |                       | MD               | Deutsches Herzzentrum München, Klinik für Herz- und Kreislauferkrankungen, Technische Universität München, Munich, Germany | Munich, Bavaria, Germany                 | Collaborator                                            |                                                                                            |
| Megi                              | Sharikadze  |                       | PhD              | Leibniz-Rechenzentrum, Munich, Germany                                                                                     | Munich, Bavaria, Germany                 | Collaborator                                            |                                                                                            |
| Ankit                             | Sinha       |                       | PhD              | Max-Planck-Institut für Biochemie, Munich, Germany                                                                         | Munich, Bavaria, Germany                 | Collaborator                                            |                                                                                            |
| Fabian                            | Starnecker  |                       | MD               | Deutsches Herzzentrum München, Klinik für Herz- und Kreislauferkrankungen, Technische Universität München, Munich, Germany | Munich, Bavaria, Germany                 | PI                                                      |                                                                                            |
| Medini                            | Steger      |                       | MSc              | Max-Planck-Institut für Biochemie, Munich, Germany                                                                         | Munich, Bavaria, Germany                 | Collaborator                                            |                                                                                            |
| Sophia                            | Steigerwald |                       | MSc              | Max-Planck-Institut für Biochemie, Munich, Germany                                                                         | Munich, Bavaria, Germany                 | Collaborator                                            |                                                                                            |

## Supplemental Online Content: Groupauthor Collaborators

\*First name, last name, and suffix (if applicable) are required and will appear in PubMed.

| *First Name and Middle Initial(s) | *Last Name  | *Suffix (eg, Jr, III) | Academic Degrees | Institution                                                                                                                | Location (city, state/province, country) | Role or Contribution, eg, chair, principal investigator | Group (if more than 1 Group listed in the byline) and/or Subgroup (eg, Steering Committee) |
|-----------------------------------|-------------|-----------------------|------------------|----------------------------------------------------------------------------------------------------------------------------|------------------------------------------|---------------------------------------------------------|--------------------------------------------------------------------------------------------|
| Ruoyu                             | Sun         |                       | PhD              | BioM Biotech Cluster Development GmbH, Martinsried, Germany                                                                | Martinsried, Bavaria, Germany            | Collaborator                                            |                                                                                            |
| Moritz                            | von Scheidt |                       | MD               | Deutsches Herzzentrum München, Klinik für Herz- und Kreislauferkrankungen, Technische Universität München, Munich, Germany | Munich, Bavaria, Germany                 | Co-Chair, PI                                            |                                                                                            |
| Matias                            | Wagner      |                       | MSc              | Institut für Humangenetik, Technische Universität München, Munich, Germany                                                 | Munich, Bavaria, Germany                 | Collaborator                                            |                                                                                            |
| Annie                             | Westerlund  |                       | PhD              | Deutsches Herzzentrum München, Klinik für Herz- und Kreislauferkrankungen, Technische Universität München, Munich, Germany | Munich, Bavaria, Germany                 | Collaborator                                            |                                                                                            |
| Jens                              | Wiehler     |                       | PhD              | BioM Biotech Cluster Development GmbH, Martinsried, Germany                                                                | Martinsried, Bavaria, Germany            | Co-PI                                                   |                                                                                            |
| Michael                           | Wierer      |                       | PhD              | Max-Planck-Institut für Biochemie, Munich, Germany                                                                         | Munich, Bavaria, Germany                 | Collaborator                                            |                                                                                            |
| Peter                             | Zinterhof   |                       | PhD              | Leibniz-Rechenzentrum, Munich, Germany                                                                                     | Munich, Bavaria, Germany                 | Collaborator                                            |                                                                                            |
