# Supplementary material for: Ticagrelor vs Prasugrel for Acute Coronary Syndrome in Routine Care
Source: PubMed Central journal article supplement (PMC11612834; doi:10.1001/jamanetworkopen.2024.48389), 2024-12-02
Supplement: jamanetwopen-e2448389-s003.pdf [file jamanetwopen-e2448389-s003.pdf]

## Data Sharing Statement

Krüger. Ticagrelor vs Prasugrel for Acute Coronary Syndrome in Routine Care. *JAMA Netw Open*. Published December 02, 2024. doi:10.1001/jamanetworkopen.2024.48389

### Data

**Data available:** No

### Additional Information

**Explanation for why data not available:** Health Claims Data are available for qualified researchers on request at OBSERVABLE data base.
